# Supplementary material
Source: Research Square preprint supplement (doi:10.21203/rs.3.rs-8773840/v1)
Supplement: Supplementary file 1 [file 80962bdfc47bb5c300b2b429.docx]

Supplementary discussion on Methods:

Energy demand modelling:

This study uses MESSAGEix model to calculate the projected energy demand under ‘Reference’ and ‘LED’ scenarios for both India and UK. Based on data from these two scenarios, we calculate three co-benefits. We focus on two scenarios reflecting different implementation levels for demand-side energy efficiency strategies until 2050. In the reference scenario, continuation of current trends and policies is assumed, with moderate increase in energy efficiency levels. In the Low Energy Demand (LED) scenario, rapid acceleration of energy efficiency improvements and energy demand reductions takes place driven by technological innovation. Energy efficiency improvements in the LED scenario (Table 1) include, for the UK, nearly-zero energy standards for new buildings, deep renovation standards and doubling of current renovation rates for existing buildings, higher penetration of heat-pumps, switch to electricity, and improved efficiency of household appliances. In India, energy efficiency improvements include the implementation of passive solutions to improve thermal comfort and reduce the need for active cooling, such as cool roofs, shading, and building shell insulation, switching from air-conditioning to evaporative cooling in dry climatic zones, energy efficient heating and cooling systems, phase out of fossil fuels for cooking, and energy efficient household appliances.

The achieved service levels are comparable across the two scenarios. In India, service levels increase under growing affluence and current policies, resulting in improved access to household appliances, clean fuels, durable housing, and larger per-capita residential floor area. In the UK, per-capita residential floor area slightly increases continuing the current trends. The underlying socio-demographic drivers for both scenarios are consistent with the Shared Socio-economic Pathway SSP2 “Middle of the road”, assuming continuation of current trends. The two scenarios assume future transformation of the energy supply system consistent with current national climate policies and no ambitious climate targets, resulting in partial decarbonization of electricity and district heating.

Table S1: MESSAGEix scenario description for both India and UK

| Energy efficiency improvements in LED scenario | India | UK |
| --- | --- | --- |
| Building shell | All new buildings are nearly-zero energy. Improved building insulation, cool roofs, and shading for existing and new buildings. | All new buildings are nearly zero-energy. Doubling of energy renovation rate with deep renovation standards applied to existing buildings. |
| Heating and cooling systems | Improved energy efficiency of heating and cooling systems. Switch from air-conditioning to evaporative cooling systems in dry climates. | Broad uptake of heat-pumps and improved efficiency of space and water heating systems. |
| Cooking | Switch to electricity and phase out of fossil fuels for cooking. | Switch to electricity and phase out of fossil fuels for cooking. |
| Appliances | Improved efficiency of household appliances. | Improved efficiency of household appliances. |

Health impacts calculations:

Health impacts of LED measures are calculated for both indoor and outdoor exposure. The methods for calculating outdoor exposure-related health impacts are different than indoor exposure-related health impacts. For instance, the study integrates the reference/baseline scenario and Low Energy Demand (LED) scenario for India and the UK— developed using activity projections from the MESSAGEix model—into the Greenhouse Gas and Air Pollution Interactions and Synergies (GAINS) model (Amann et al., 2020). A more detailed description of the GAINS model can be found in Annexure-I. GAINS has been used to address air pollution impacts on human health from fine particulate matter and ground-level ozone, vegetation damage caused by ground-level ozone, the acidification of terrestrial and aquatic ecosystems and excess nitrogen deposition to soils, in addition to the mitigation of greenhouse gas emissions. To calculate health impacts from indoor exposure, we use active days indicator from Chatterjee and Urge-Vorsatz (2021) study, where Active days measure number of avoided disease-specific sick days, by implementing LED measures in the residential building sector in both India and UK. Active days indicators include respiratory, and cardiovascular disease-related absenteeism and presenteeism for both Indian and UK. Similar to health impacts due to outdoor exposure, for indoor exposure as well, we use MESSAGEix Reference and LED scenarios to understand how many people are using the energy-efficient buildings. Based on the population figure, we then estimate the country-specific total sick days by adding disease-specific absenteeism and presenteeism. Lastly, based on the dose-response model described in Chatterjee and Urge-Vorsatz (2021) study, we calculate how many sick days and healthy life years loss can be avoided by using demand measures for both India and UK.

To monetize mortality-related health benefits from reduced energy demand in the building sector, we apply the Value of a Statistical Life (VSL) approach, an economic metric estimating the monetary value of reducing mortality risk (OECD, 2012; Viscusi & Aldy, 2003). VSL reflects society’s willingness to pay to prevent one statistical death through interventions such as cleaner air, safer transport, or improved healthcare. We use a VSL of USD 0.64 million for India (Majumder & Madheswaran, 2018) and USD 2 million for the UK (Carthy et al., 1998) to monetize reductions in premature deaths under the LED scenario. For morbidity-related benefits, we apply purchasing power parity-adjusted average annual wages for each country from the OECD dataset.

Energy security calculations:

This study follows the methodology developed by Bento et al. (2024) to assess synthetic policies across countries and compare the energy security-related impacts of demand-side interventions. The simulation tool developed in Bento et al. (2024) study is used to evaluate scenario results on final energy, electricity demand, and activity changes from MESSAGEix-Buildings. These results serve as inputs into the simulation tool at useful or final energy levels, where the underlying interventions create multiplier effects in primary energy reductions and fuel mix adjustments through their energy cascade interconnections.

We identify the largest fossil fuel import (usually oil). Then we reduce import flows from the two largest sources to 0. We calculate the concentration ratio (CR2) using the shares of the 3rd and 4th original largest import sources. This ratio is then used to calculate the compound Shannon indexes. The imports from the original two largest sources are allocated to the category “other import sources”. We decrease the useful energy (UE) demand for low-temperature heating from fossil fuels-including oil, gas, and biomass, and coal where appropriate. The amount of reduction corresponds to 10% of primary energy (PE) equivalent, that is multiplied by the ratio UE/PE of low-temperature heat efficiency. The reduction is allocated among the different fuel sources (usually oil and natural gas) to minimize fossil fuel imports.

We link the MESSAGEix-Buildings model outcomes with the energy-security simulation tool of Bento et al. (2024), taking the final energy savings and changes in the final energy mix between 2020 to 2050 from the demand model to calculate implied primary energy mixes. The primary energy efficiencies are assumed to be unchanged, in order to separate the demand-side impacts from other factors. SSP2 scenarios rely more heavily on supply-solutions, and lead to smaller energy savings (or even a 26% increase in India), while achieving more decarbonization rather through fuel shifts. On the other hand, LED scenarios assume drastic final energy demand drops (-39% in India and -68% in the UK) and a drastic reduction on fuel shift pressures (see Table 2).

Table S2: Energy demand reduction calculated from MESSAGEix-Buildings model for India and UK in 2050

|  | Total final energy | | Electricity | |
| --- | --- | --- | --- | --- |
|  | SSP2 | LED | SSP2 | LED |
| India | 26% | -39% | 333% | 316% |
| UK | -31% | -68% | 27% | -5% |

Estimating Employment impacts:

To ensure methodological rigor and avoid double-counting, our employment impact estimates exclude induced jobs, particularly in India where rising living standards may amplify rebound effects. We distinguish between temporary and long-term employment, recognizing that energy efficiency investments often generate short-term construction jobs alongside sustained operational roles. Additionally, the analysis accounts for formal employment only, due to the lack of sector-specific data on informal labour, especially in the UK, where Hazans (2011) estimates that 22% of the extended labour force is informally employed. FTE job multipliers used in our UK estimates are based on the most recent publicly available data and show a slight decline over time, reflecting increasing labour productivity. For India, we anticipate a similar downward trend in FTE multipliers as manufacturing efficiency improves. Our job creation estimates are informed by the ACEEE methodology, which suggests that a $1 million USD investment in energy efficiency generates approximately 20 direct jobs in the U.S. economy. Applying this framework, we estimate that in the UK, a $1 million USD investment yields around 11 direct and 47 indirect full-time jobs. These figures underscore the substantial employment potential of low-emission development (LED) strategies, while highlighting the importance of contextual labor dynamics in interpreting job creation outcomes.

Data of Health Impacts:

| Table S3: Mortality and Morbidity-specific health projections for India and UK | | | | | |
| --- | --- | --- | --- | --- | --- |
| Premature deaths (thousands) | | Reference | Difference | LED | |
|  | 2020 | 1013 |  |  | |
|  | 2030 | 1272 | 14 | 1258 | |
|  | 2040 | 1596 | 34 | 1562 | |
|  | 2050 | 1936 | 62 | 1874 | |
|  |  | Reference | Difference | LED | |
| VSL (billion $) | 2020 | 648 |  |  | |
|  | 2030 | 814 | 9 | 805 | |
|  | 2040 | 1021 | 22 | 999 | |
|  | 2050 | 1239 | 39 | 1200 | |
|  | | | | |  |
| Premature deaths (thousands) | | Reference | Difference | LED | |
|  | 2020 | 33 |  |  | |
|  | 2030 | 25 | 2 | 24 | |
|  | 2040 | 24 | 3 | 21 | |
|  | 2050 | 24 | 3 | 21 | |
|  |  | Reference | Difference | LED | |
| VSL (billion $) | 2020 | 66 |  |  | |
|  | 2030 | 51 | 3 | 48 | |
|  | 2040 | 48 | 5 | 43 | |
|  | 2050 | 47 | 6 | 42 | |
| Active days gain – India (in millions) | | |  |  | |
|  |  | Reference | Difference | LED | |
|  | 2020 | 6552 |  |  | |
|  | 2030 | 7079 | 361 | 6718 | |
|  | 2040 | 7466 | 733 | 6733 | |
|  | 2050 | 7639 | 1060 | 6579 | |
| Morbidity related cost (million$) in India | | | | | |
|  |  | Reference | Difference | LED | |
|  | 2020 | 46 |  |  | |
|  | 2030 | 52 | 3 | 50 | |
|  | 2040 | 58 | 6 | 52 | |
|  | 2050 | 62 | 9 | 54 | |
| Active days gain – UK (in millions) | | |  |  | |
|  |  | Reference | Difference | LED | |
|  | 2020 | 272 |  |  | |
|  | 2030 | 279 | 40 | 239 | |
|  | 2040 | 287 | 57 | 230 | |
|  | 2050 | 296 | 67 | 229 | |
| Morbidity related cost (million$) in India | | | | |  |
|  |  | Reference | Difference | LED | |
|  | 2020 | 16 |  |  | |
|  | 2030 | 17 | 2 | 14 | |
|  | 2040 | 18 | 3 | 14 | |
|  | 2050 | 19 | 4 | 14 | |

Data of Employment Impacts:

Table S4: Direct and indirect employment projections for India and UK

| Year | 2025 | 2030 | 2040 | 2050 |
| --- | --- | --- | --- | --- |
| UK annual incremental investment (bn $) | 130.18 | 431.4461 | 863.8562 | 1115.346 |
| **UK net employment impacts - total** | **517,158** | **1,713,983** | **3,431,796** | **4,430,876** |
| UK net employment - direct | 152,048 | 503,924 | 1,008,973 | 1,302,710 |
| UK net employment - indirect | 365,109 | 1,210,059 | 2,422,823 | 3,128,166 |
| India annual incremental investment (bn $) | 5.595 | 573.091 | 1911.811 | 3423.007 |
| **India formal employment impacts - total (with growth rate assumptions)** | **67,926** | **6,245,779** | **18,746,328** | **30,495,110** |
| India formal employment - direct (with growth rate assumptions) | 17,227 | 1,764,394 | 5,885,951 | 10,538,515 |
| India formal employment - indirect (with growth rate assumptions) | 50,699 | 4,481,385 | 12,860,377 | 19,956,595 |
|  |  |  |  |  |
| **LED scenario** |  |  |  |  |
| Year | 2025 | 2030 | 2040 | 2050 |
| UK Annual investment (bn $) | 406.442 | 982.130 | 2048.235 | 3127.034 |
| UK employment impacts - total | 1614649 | 3901655 | 8136913 | 12422601 |
| UK employment - direct | 474719 | 1147115 | 2392312 | 3652336 |
| UK employment - indirect | 1139930 | 2754540 | 5744601 | 8770265 |
| India annual investment (bn $) | 2117.1 | 5258.51463 | 12483.6589 | 20512.0919 |
| India formal employment impacts - total | 25,700,651 | 59,898,645 | 127,382,675 | 189,804,526 |
| India employment - direct | 6,517,965 | 16,189,548 | 38,433,819 | 63,151,199 |
| India employment - indirect | 19,182,686 | 43,709,096 | 88,948,856 | 126,653,327 |
|  |  |  |  |  |
| **SSP2 scenario** |  |  |  |  |
| Year | 2025 | 2030 | 2040 | 2050 |
| UK annual investment (bn $) | 276.262 | 550.684 | 1184.378 | 2011.687 |
| UK employment impacts - total | 1097492 | 2187672 | 4705117 | 7991724 |
| UK employment - direct | 322671 | 643192 | 1383339 | 2349625 |
| UK employment - indirect | 774821 | 1544481 | 3321778 | 5642098 |
| India annual investment (bn $) | 2111.5 | 4685.42316 | 10571.8477 | 17089.0851 |
| India formal employment impacts - total | 25,632,725 | 53,652,866 | 108,636,347 | 159,309,416 |
| India employment - direct | 6,500,739 | 14,425,154 | 32,547,868 | 52,612,684 |
| India employment - indirect | 19,131,987 | 39,227,711 | 76,088,479 | 106,696,732 |
